# Supplementary material for: Human adipose tissue microvascular endothelial cells secrete PPARγ ligands and regulate adipose tissue lipid uptake
Source: JCI journal article supplement (doi:10.1172/jci.insight.125914), 2019-03-06
Supplement: sd1 [file 1]

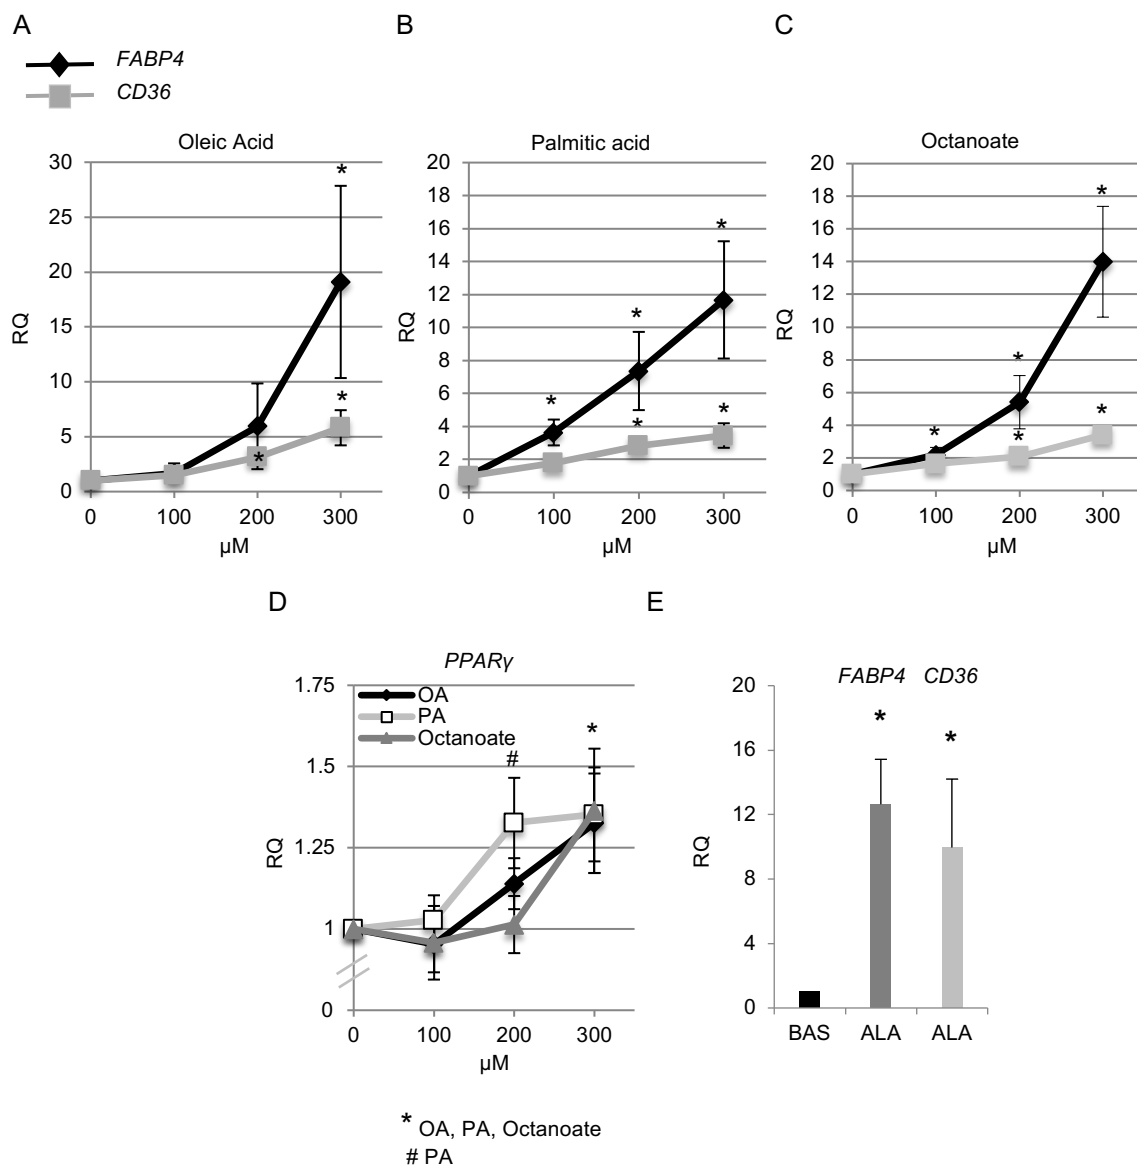

**Supplemental Figure 1. Fatty acid dose response curves for aMVEC.** Cells were treated without (BAS) or with the indicated concentrations of (A) oleic acid (B) palmitic acid or (C) octanoate for 24 h. qRT-PCR of *CD36* and *FABP4* expressed as mRNA/18s rRNA ratio (RQ), data from at least five experiments. \* $P < 0.05$  compared to basal. (D) Effect of oleic acid (OA), palmitic acid (PA) and octanoate on *PPAR $\gamma$*  expression. \* $P < 0.05$  (OA, PA, Octanoate), # $P < 0.05$  (PA) compared to BAS. Data obtained from at least four experiments. (E) aMVEC were incubated without (BAS) or with 100  $\mu$ M  $\alpha$ -Linolenic acid (ALA) for 24 h. qRT-PCR of *CD36* and *FABP4*,  $n = 5$ . \* $P < 0.05$  compared to BAS. Bars represent mean  $\pm$  SEM. Wilcoxon Signed-Rank Test.

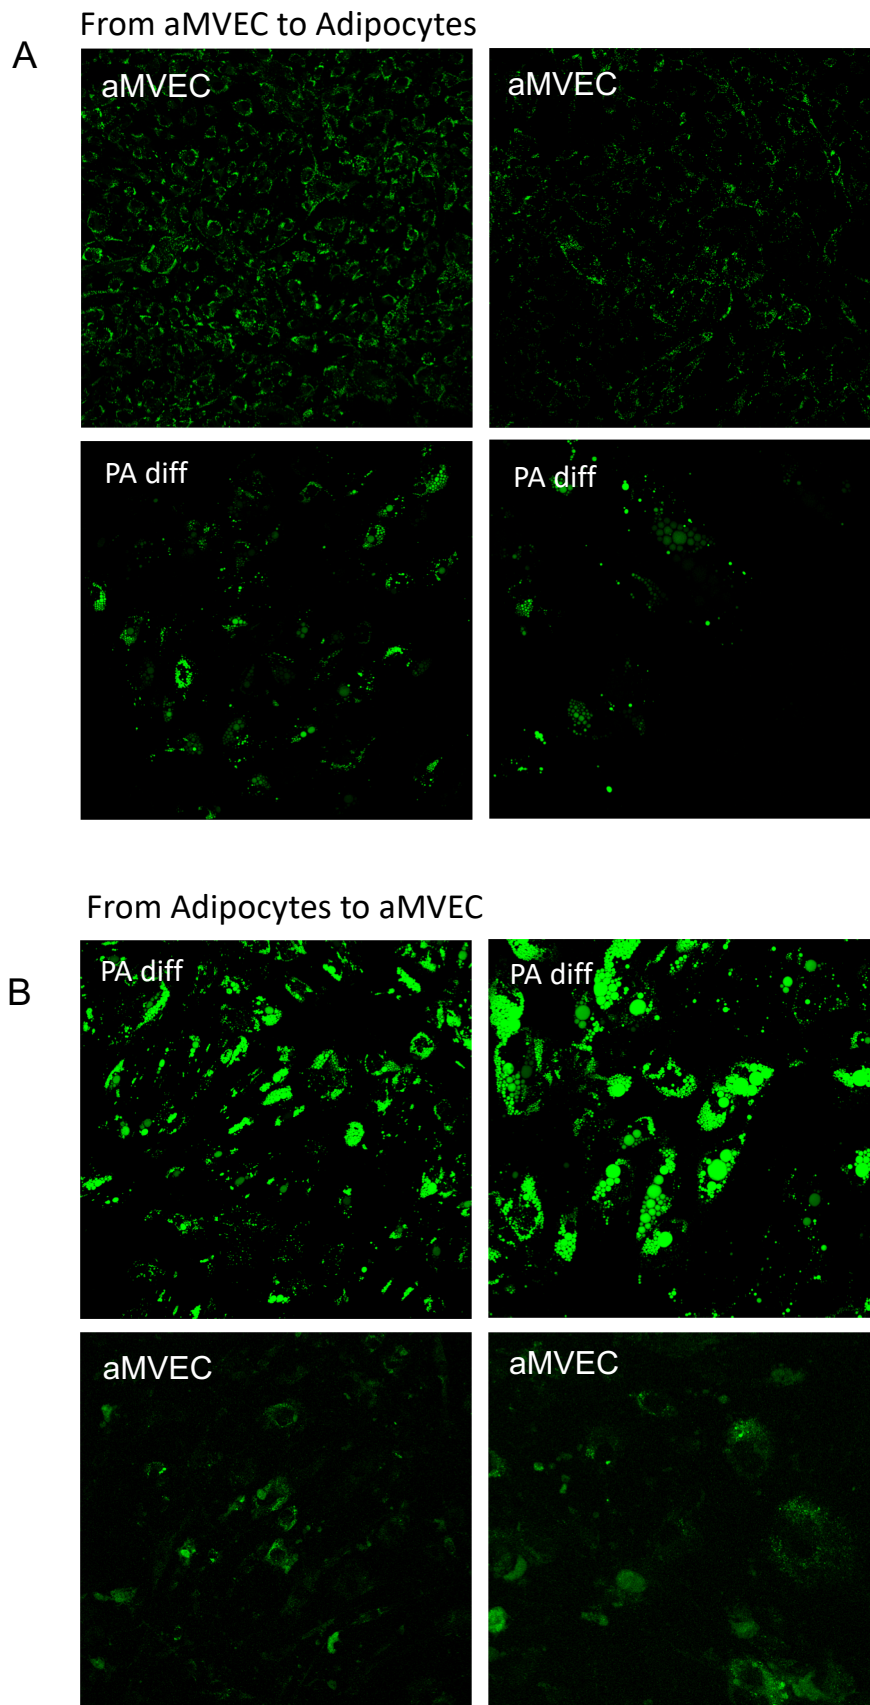

Supplemental Figure 2. Additional validation of aMVEC-adipocyte cross-talk and fatty acid uptake measured with Bodipy. Same experimental procedures as shown in Figure 3.

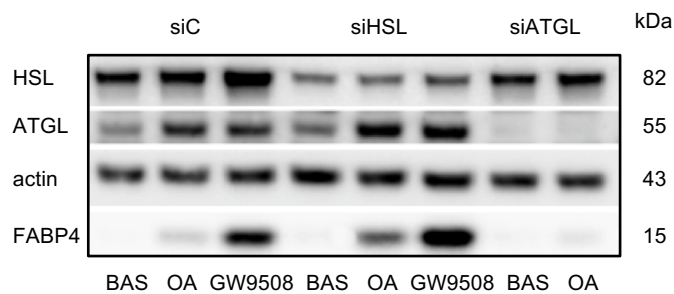

**Supplemental Figure 3. Suppressive effect of HSL siRNA.** aMVEC were transfected with siControl (siC), siHSL or siATGL. 24 h post transfection media was changed to stimulation media without (BAS), with 300  $\mu$ M OA or 100  $\mu$ M GW9508 and incubated for additional 24 h. Western blots were performed using antibodies specific for ATGL, FABP4, HSL and actin was used as loading control. The figure shows representative western blots of HSL, ATGL, actin and FABP4 in cells transfected with siControl (siC) (left), siHSL (centre) or with siATGL (right), n=2-3.

A

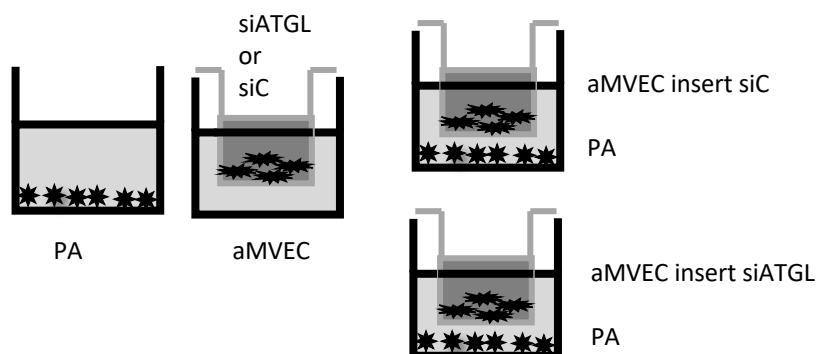

B

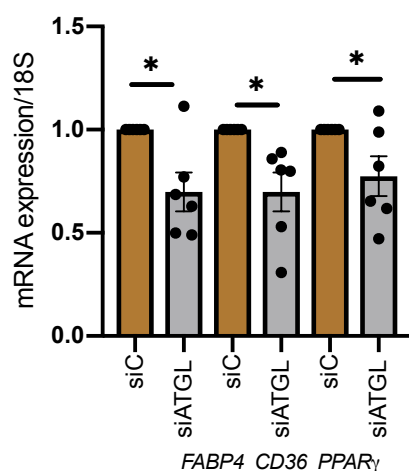

**Supplemental Figure 4. aMVEC ATGL silencing influences preadipocytes (PA) gene expression.** (A) Experimental design ThinCert™ co-culture. PA were independently seeded in cell culture dishes and aMVEC silenced for ATGL (siATGL) or siControl (siC) on the insert membrane. PA were co-cultured with the aMVEC insert for 48 h. (B) qRT-PCR of *FABP4*, *CD36* and *PPAR $\gamma$*  in PA, n=6.\* P<0.05 compared to siC. Bars represent mean  $\pm$  SEM. Wilcoxon Signed-Rank Test.

Supplemental Table 1. Primers and Probes

|                                                |
|------------------------------------------------|
| hATGL-FP: TCAGACGGCGAGAATGTCATTA               |
| hATGL-RP: TGAAACCGCTGCAGACATTG                 |
| hATGL-P: CCCACTTCAACTCCAAGGACGAGCTCA           |
|                                                |
| hGLUT4-FP: TCTGGCATCAATGCTGTTTTCTAT            |
| hGLUT4-RP: ACCAACAACACCGAGACCAAG               |
| hGLUT4-P: TGACCACACCAGCTCCTATGGTGGC            |
|                                                |
| hCEBPa-FP: CCAAGAAGTCGGTGGACAAGA               |
| hCEBPa-RP: CGCACCGCGATGTTGTT                   |
| hCEBPa-P: CGCCGCACCCGGTACTCGTT                 |
|                                                |
| hPPAR $\gamma$ 2-FP: TCTGCAAACATATCACAAGAAATGA |
| hPPAR $\gamma$ 2-RP: TCCACGGAGCTGATCCCAA       |
| hPPAR $\gamma$ 2-P: CAGAGATGCCATTCTGGCCCACC    |
|                                                |
| hFABP4-FP: GACAGGAAAGTCAAGAGCACCATA            |
| hFABP4-RP: GACGCATTCCACCACCAGTT                |
| hFABP4-P: CTGCACATGTACCAGGACACCCCA             |
